# Supplementary material
Source: PubMed Central journal article supplement (PMC9701615)
Supplement: NIHMS1850387-supplement-1.pdf [file NIHMS1850387-supplement-1.pdf]

**Supplemental Table 1. Patient characteristics by study site**

|                               | <b>PHHS (n=31)<br/>n (%)</b> | <b>CUH (n=145)<br/>n (%)</b> | <b>P<br/>value</b> |
|-------------------------------|------------------------------|------------------------------|--------------------|
| Age (year)*                   | 59 (51-64)                   | 64 (57-69)                   | <b>0.008</b>       |
| Male                          | 25 (80.6)                    | 105 (72.4)                   | 0.344              |
| Race                          |                              |                              |                    |
| Caucasian                     | 3 (9.7)                      | 119 (82.1)                   | <b>&lt;0.001</b>   |
| Non-Caucasian                 | 28 (90.3)                    | 26 (17.9)                    |                    |
| Ever smoker                   | 16 (51.6)                    | 64 (44.1)                    | 0.448              |
| Histological subtype          |                              |                              |                    |
| ccRCC                         | 28 (90.3)                    | 121 (83.4)                   | 0.335              |
| Non-ccRCC                     | 3 (9.7)                      | 24 (16.6)                    |                    |
| Nephrectomy                   | 23 (74.2)                    | 125 (86.2)                   | 0.097              |
| Previous radiation therapy    | 15 (48.4)                    | 89 (61.4)                    | 0.182              |
| Prior systemic therapies      | 26 (83.9)                    | 115 (79.3)                   | 0.564              |
| IMDC score                    |                              |                              |                    |
| Favorable                     | 4 (12.9)                     | 28 (19.3)                    | 0.159              |
| Intermediate                  | 17 (54.8)                    | 79 (54.5)                    |                    |
| Poor                          | 10 (32.3)                    | 27 (18.6)                    |                    |
| Missing                       | 0 (0)                        | 11 (7.6)                     |                    |
| Initial immunotherapy regimen |                              |                              |                    |
| Nivolumab                     | 25 (80.6)                    | 108 (74.5)                   | 0.469              |
| Nivolumab+Ipilimumab          | 6 (19.4)                     | 37 (25.5)                    |                    |
| Any exposure to Ipilimumab    | 7 (22.6)                     | 77 (53.1)                    | <b>0.002</b>       |
| Non-colitis irAEs             | 6 (19.4)                     | 67 (46.2)                    | <b>0.006</b>       |
| Exposure to PPIs              | 15 (48.4)                    | 89 (61.4)                    | 0.182              |
| Colitis of any etiology       | 5 (16.1)                     | 22 (15.2)                    | 0.893              |
| Median follow up (month)      | 29.0                         | 27.0                         | 0.55               |

Data are shown as frequencies (percentages) unless otherwise indicated. ccRCC: clear cell renal cell carcinoma, CUH: Clements University Hospital, ICI: immune checkpoint inhibitor, IMDC: international metastatic renal cell carcinoma database consortium, irAE: immune-related adverse event, PHHS: Parkland Health & Hospital System, PPI: proton pump inhibitor. *P* values were calculated by comparing patients at PHHS vs CUH. \*Data are shown as medians (interquartile ranges).
